# Supplementary material for: Noninvasive Detection of Urothelial Carcinoma by Cost-effective Low-coverage Whole-genome Sequencing from Urine-Exfoliated Cell DNA
Source: Oxford University Press journal article supplement (doi:10.1158/1078-0432.ccr-20-0401), 2020-10-09
Supplement: 10780432ccr200401-sup-236661_3_supp_6438201_qdrkdv.docx [file 10780432ccr200401-sup-236661_3_supp_6438201_qdrkdv.docx]

**Table S8 Comparison between the results of UroCAD and cytology tests in training cohort.**

|  | Category* | Cytology  Negative | Cytology  Positive |
| --- | --- | --- | --- |
| **UroCAD** | - | 8 | 0 |
| + | 7 | 0 |
| ++ | 3 | 0 |
| +++ | 20 | 14 |

* UroCAD strong positive test was marked with ‘+++’, medium positive test ‘++’, weak positive ‘+”, and negative ‘-‘. They were defined as at least 3 chromosome arms with |Z|>=3.21, 2 chromosome arms with |Z|>=3.21, 1 chromosome arm with |Z|>=3.21 and no chromosome arm with |Z|>=3.21, respectively.
